# Supplementary material for: Modeling the properties of lanthanoid single-ion magnets using an effective point-charge approach
Source: Royal Society of Chemistry journal article supplement (doi:10.1039/c2dt31411h), 2012-01-01
Supplement: c2dt31411h.pdf [file c2dt31411h.pdf]

## Supplementary Material

### Modeling the properties of lanthanoid single-ion magnets using an effective point-charge approach

José J. Baldoví,<sup>a</sup> Juan J. Borrás-Almenar,<sup>a</sup> Juan M. Clemente-Juan,<sup>a</sup> Eugenio Coronado<sup>\*a</sup> and Alejandro Gaita-Ariño<sup>\*a</sup>

| Energy (cm <sup>-1</sup> ) | Wave function              |                            |                           |                           |
|----------------------------|----------------------------|----------------------------|---------------------------|---------------------------|
| 0                          | <b>1.00</b>   <b>-5</b> >  | 0.01·  <b>-1</b> >         |                           |                           |
| 0                          | 0.01·  <b>1</b> >          | <b>1.00</b>   <b>5</b> >   |                           |                           |
| 25                         | <b>0.71</b> ·  <b>-6</b> > | 0.39·  <b>-2</b> >         | 0.39·  <b>2</b> >         | <b>0.71</b> ·  <b>6</b> > |
| 25                         | <b>0.71</b> ·  <b>-6</b> > | 0.37·  <b>-2</b> >         | 0.37·  <b>2</b> >         | <b>0.71</b> ·  <b>6</b> > |
| 31                         | 0.04·  <b>-8</b> >         | <b>0.71</b> ·  <b>-4</b> > | <b>0.71</b> ·  <b>4</b> > | 0.04·  <b>8</b> >         |
| 31                         | 0.04·  <b>-8</b> >         | <b>0.70</b> ·  <b>-4</b> > | <b>0.70</b> ·  <b>4</b> > | 0.04·  <b>8</b> >         |
| 89                         | <b>0.79</b> ·  <b>-7</b> > | 0.61·  <b>-3</b> >         | 0.01·  <b>1</b> >         |                           |
| 89                         | 0.01·  <b>-1</b> >         | 0.61·  <b>3</b> >          | <b>0.79</b> ·  <b>7</b> > |                           |
| 110                        | 0.61·  <b>-7</b> >         | <b>0.79</b> ·  <b>-3</b> > | 0.02·  <b>1</b> >         |                           |
| 110                        | 0.02·  <b>-1</b> >         | <b>0.79</b> ·  <b>3</b> >  | 0.61·  <b>7</b> >         |                           |
| 162                        | <b>0.92</b>   <b>-8</b> >  | 0.06  <b>-4</b> >          | 0.06  <b>4</b> >          | 0.39  <b>8</b> >          |
| 162                        | 0.39  <b>-8</b> >          | 0.02  <b>-4</b> >          | 0.06  <b>4</b> >          | <b>0.92</b>   <b>8</b> >  |
| 179                        | 0.04·  <b>-6</b> >         | <b>0.71</b> ·  <b>-2</b> > | <b>0.71</b> ·  <b>2</b> > | 0.04·  <b>6</b> >         |
| 190                        | 0.04·  <b>-6</b> >         | <b>0.71</b> ·  <b>-2</b> > | <b>0.71</b> ·  <b>2</b> > | 0.04·  <b>6</b> >         |
| 247                        | 0.02·  <b>-5</b> >         | <b>1.00</b>   <b>-1</b> >  | 0.03·  <b>3</b> >         |                           |
| 247                        | 0.03·  <b>-3</b> >         | <b>1.00</b>   <b>1</b> >   | 0.02·  <b>5</b> >         |                           |
| 270                        | <b>1.00</b>   <b>0</b> >   |                            |                           |                           |

**Table S.1:** Energies and modulus of the contribution of each  $M_J$  to the wave-functions of the ground state multiplets of HoPc<sub>2</sub>

| Energy<br>(cm <sup>-1</sup> ) | Wave function          |                       |                       |             |
|-------------------------------|------------------------|-----------------------|-----------------------|-------------|
| 0                             | 0.01· -9/2>            | <b>1.00· -1/2&gt;</b> | 0.01· 7/2>            |             |
| 0                             | 0.01· -7/2>            | <b>1.00· 1/2&gt;</b>  | 0.01· 9/2>            |             |
| 58                            | 0.05· -11/2>           | <b>1.00· -3/2&gt;</b> | 0.06· 5/2>            | 0.01· 13/2> |
| 58                            | 0.01· -13/2>           | 0.06· 5/2>            | <b>1.00· 3/2&gt;</b>  | 0.05· 11/2> |
| 79                            | <b>1.00· -15/2&gt;</b> | 0.06· -7/2>           |                       |             |
| 79                            | 0.06· 7/2>             | <b>1.00· 15/2&gt;</b> |                       |             |
| 129                           | <b>0.89· -13/2&gt;</b> | 0.46· -5/2>           | 0.04· 3/2>            |             |
| 129                           | 0.04· -3/2>            | 0.46· 5/2>            | <b>0.89· 13/2&gt;</b> |             |
| 159                           | 0.46· -13/2>           | <b>0.89· -5/2&gt;</b> | 0.04· 3/2>            |             |
| 159                           | 0.04· -3/2>            | <b>0.89· 5/2&gt;</b>  | 0.46· 13/2>           |             |
| 234                           | <b>1.00· -11/2&gt;</b> | 0.05· -3/2>           |                       |             |
| 234                           | 0.05· -3/2>            | <b>1.00· 11/2&gt;</b> |                       |             |
| 240                           | 0.06· -13/2>           | <b>1.00· -7/2&gt;</b> | 0.01· 1/2>            |             |
| 240                           | 0.01· -1/2>            | <b>1.00· 7/2&gt;</b>  | 0.06· 13/2>           |             |
| 275                           | <b>1.00· -9/2&gt;</b>  | 0.01· -1/2>           |                       |             |
| 275                           | 0.01· 1/2>             | <b>1.00· 9/2&gt;</b>  |                       |             |

**Table S.2:** Energies and modulus of the contribution of each  $M_J$  to the wave-functions of the ground state multiplets of ErPc<sub>2</sub>

| Energy<br>(cm <sup>-1</sup> ) | Wave function       |                     |                    |                    |
|-------------------------------|---------------------|---------------------|--------------------|--------------------|
| 0                             | 0.01· -4>           | <b>1.00· 0&gt;</b>  | 0.01· 4>           |                    |
| 3                             | <b>0.71· -6&gt;</b> | 0.05· -2>           | 0.05· 2>           | <b>0.71· 6&gt;</b> |
| 3                             | <b>0.71· -6&gt;</b> | 0.05· -2>           | 0.05· 2>           | <b>0.71· 6&gt;</b> |
| 18                            | 0.01· -5>           | <b>1.00· -1&gt;</b> | 0.05· 3>           |                    |
| 18                            | 0.05· -3>           | <b>1.00· 1&gt;</b>  | 0.01· 5>           |                    |
| 69                            | 0.07· -6>           | <b>0.70· -2&gt;</b> | <b>0.70· 2&gt;</b> | 0.07· 6>           |
| 88                            | 0.05· -6>           | <b>0.71· -2&gt;</b> | <b>0.71· 2&gt;</b> | 0.05· 6>           |
| 178                           | <b>1.00· -3&gt;</b> | 0.05· 1>            |                    |                    |
| 178                           | 0.05· -1>           | <b>1.00· 3&gt;</b>  |                    |                    |
| 291                           | <b>0.71· -4&gt;</b> | <b>0.71· 4&gt;</b>  |                    |                    |
| 291                           | <b>0.71· -4&gt;</b> | <b>0.71· 4&gt;</b>  |                    |                    |
| 312                           | <b>1.00· -5&gt;</b> | 0.01· 1>            |                    |                    |
| 312                           | 0.01· -1>           | <b>1.00· 5&gt;</b>  |                    |                    |

**Table S.3:** Energies and modulus of the contribution of each  $M_J$  to the wave-functions of the ground state multiplets of TmPc<sub>2</sub>

| Energy<br>( $\text{cm}^{-1}$ ) | Wave function                |                             |
|--------------------------------|------------------------------|-----------------------------|
| 0                              | <b>1.00</b> · $ -5/2\rangle$ | 0.04· $ 3/2\rangle$         |
| 0                              | 0.04· $ -3/2\rangle$         | <b>1.00</b> · $ 5/2\rangle$ |
| 224                            | <b>1.00</b> · $ -3/2\rangle$ | 0.04· $ 5/2\rangle$         |
| 224                            | 0.04· $ -5/2\rangle$         | <b>1.00</b> · $ 3/2\rangle$ |
| 366                            | <b>0.92</b> · $ -7/2\rangle$ | 0.38· $ 1/2\rangle$         |
| 366                            | 0.38· $ -1/2\rangle$         | <b>0.92</b> · $ 7/2\rangle$ |
| 372                            | 0.38· $ -7/2\rangle$         | <b>0.92</b> · $ 3/2\rangle$ |
| 372                            | <b>0.92</b> · $ -3/2\rangle$ | 0.38· $ 7/2\rangle$         |

**Table S.4:** Energies and modulus of the contribution of each  $M_J$  to the wave-functions of the ground state multiplets of  $\text{YbPc}_2$
